# Supplementary material for: Transcatheter Aortic Valve Replacement for Bicuspid vs. Tricuspid Aortic Stenosis among Patients at Low Surgical Risk in China: From the Multicenter National NTCVR Database
Source: MDPI journal article supplement (doi:10.3390/jcm12010387), 2023-01-03
Supplement: s1 [file s1]

**Supplementary Table S1.** Procedural Details

|                         | BAV( <i>n</i> =229) | TAV( <i>n</i> =160) | <i>P</i> value |
|-------------------------|---------------------|---------------------|----------------|
| Procedure status        |                     |                     |                |
| Elective                | 99.1% (227/229)     | 100% (160/160)      | 0.514          |
| Emergent                | 0.9% (2/229)        | 0% (0/160)          | 0.514          |
| Transfemoral access     | 95.2% (218/229)     | 98.7% (158/160)     | 0.103          |
| Transcarotid access     | 2.6% (6/229)        | 1.3% (2/160)        | 0.566          |
| Transapical access      | 2.2% (5/229)        | 0% (0/160)          | 0.081          |
| Balloon pre-dilatation  | 92.6% (212/229)     | 92.5% (148/160)     | 0.977          |
| Type of anesthesia      |                     |                     |                |
| General anesthesia      | 93.4% (214/229)     | 93.1% (149/160)     | 0.900          |
| Local anesthesia        | 6.6% (15/229)       | 6.9% (11/160)       | 0.900          |
| Vascular closure way    |                     |                     |                |
| Arterial closure device | 79.5% (182/229)     | 74.4% (119/160)     | 0.237          |
| Surgical sutures        | 20.5% (47/229)      | 25.6% (41/160)      | 0.237          |

Values are n/N (%).
